# Supplementary material
Source: PubMed Central journal article supplement (PMC7263704)

## **Supporting Information**

### **Magnetic Bead-Immobilized Mammalian Cells are Effective Targets**

#### **to Enrich Ligand-displaying Yeast**

Patrick S. Lown<sup>1</sup> and Benjamin J. Hackel<sup>1</sup>

<sup>1</sup> Department of Chemical Engineering and Materials Science, University of Minnesota – Twin  
Cities, Minneapolis, MN 55455

Corresponding Author:

Benjamin J. Hackel

421 Washington Avenue SE

356 Amundson Hall

Minneapolis, MN 55455

612.624.7102

hackel@umn.edu

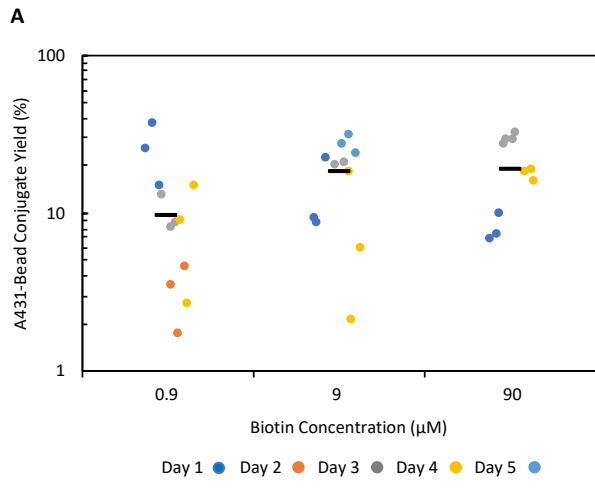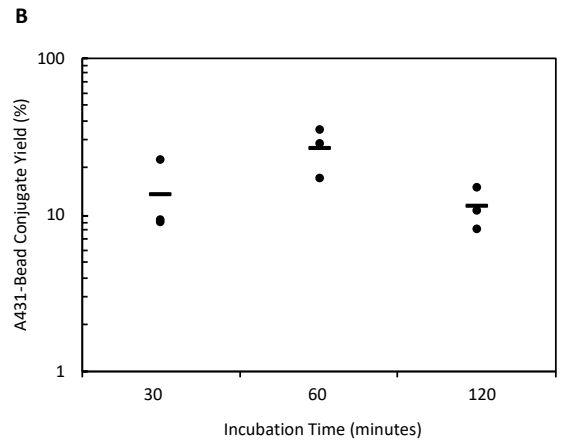

Supplement: NIHMS1591834-supplement-SI.pdf [file NIHMS1591834-supplement-SI.pdf]
